# Supplementary material for: PrrT/A, a Pseudomonas aeruginosa Bacterial Encoded Toxin-Antitoxin System Involved in Prophage Regulation and Biofilm Formation
Source: PubMed Central journal article supplement (PMC9241795; doi:10.1128/spectrum.01182-22), 2022-05-16
Supplement: spectrum.01182-22-s001.pdf [file spectrum.01182-22-s001.pdf]

## Supplementary materials

**Table S1**

| Strain or plasmid                         | Description                                                                                                                                                               | Source                                      |
|-------------------------------------------|---------------------------------------------------------------------------------------------------------------------------------------------------------------------------|---------------------------------------------|
| <i>P. aeruginosa</i> strains              |                                                                                                                                                                           |                                             |
| PAO1                                      | Wild-type                                                                                                                                                                 | (1)                                         |
| PAO1/ <i>prpA</i> -FLAG                   | Wild type with pUCP18/ <i>prpA</i> _FLAG plasmid,                                                                                                                         | This study                                  |
| PAO1/ <i>prpT</i> -HIS                    | Wild type with pJN105/ <i>prpT</i> _HIS plasmid, Gm <sup>r</sup>                                                                                                          | This study                                  |
| PAO1/ <i>prpT</i> -HIS/ <i>prpA</i> -FLAG | Wild type with pJN105/ <i>prpT</i> _HIS and <i>prpT</i> _HIS plasmids, Gm <sup>r</sup> , crb <sup>r</sup>                                                                 | This study                                  |
| 39016                                     | LMG 27,647 <i>P. aeruginosa</i> (Schoeter 1872) migula 1900 AL                                                                                                            | BCCM- biological origin: keratitis patients |
| 39016 $\Delta$ <i>prpA</i>                | 39016 with <i>ampR</i> marked deletion of <i>prpA</i> , crb <sup>r</sup>                                                                                                  | This study                                  |
| 39016 $\Delta$ <i>prpT</i>                | 39016 with <i>ampR</i> marked deletion of <i>prpT</i> , crb <sup>r</sup>                                                                                                  | This study                                  |
| 39016 $\Delta$ <i>prpTA</i>               | 39016 with <i>ampR</i> marked deletion of <i>prpT/prpA</i> , crb <sup>r</sup>                                                                                             | This study                                  |
| 39016 $\Delta$ <i>prpA/prpA</i>           | 39016 with <i>ampR</i> marked deletion of <i>prpA</i> , with <i>att-tn7</i> insertion of arabinose inducible <i>prpA</i> , Gm <sup>r</sup> crb <sup>r</sup>               | This study                                  |
| 39016 $\Delta$ <i>prpA/prpT</i>           | 39016 $\Delta$ <i>prpA</i> , with <i>att-tn7</i> insertion of arabinose inducible <i>prpA</i> , Gm <sup>r</sup> crb <sup>r</sup>                                          | This study                                  |
| 39016 $\Delta$ <i>prpT/prpT</i>           | 39016 $\Delta$ <i>prpT</i> , with <i>att-tn7</i> insertion of arabinose inducible <i>prpA</i> , Gm <sup>r</sup> crb <sup>r</sup>                                          | This study                                  |
| 39016 $\Delta$ <i>prpTA/prpT</i>          | 39016 $\Delta$ <i>prpTA</i> , with <i>att-tn7</i> insertion of arabinose inducible <i>prpA</i> , Gm <sup>r</sup> crb <sup>r</sup>                                         | This study                                  |
| 39016 /mCherry                            | 39016 with <i>att-ctx</i> insertion of <i>prpT/A</i> promoter fused to mCherry                                                                                            | This study                                  |
| 39016 $\Delta$ <i>prpA</i> /mCherry       | 39016 $\Delta$ <i>prpA</i> with <i>att-ctx</i> insertion of <i>prpT/A</i> promoter fused to mCherry                                                                       | This study                                  |
| 39016 $\Delta$ <i>prpT</i> /mCherry       | 39016 $\Delta$ <i>prpT</i> with <i>att-ctx</i> insertion of <i>prpT/A</i> promoter fused to mCherry                                                                       | This study                                  |
| 39016 $\Delta$ <i>prpTA</i> /mCherry      | 39016 $\Delta$ <i>prpTA</i> with <i>att-ctx</i> insertion of <i>prpT/A</i> promoter fused to mCherry                                                                      | This study                                  |
| 39016 $\Delta$ <i>prpTA/prpT</i> /mCherry | 39016 $\Delta$ <i>prpTA/prpT</i> with <i>att-ctx</i> insertion of <i>prpT/A</i> promoter fused to mCherry                                                                 | This study                                  |
| 39016 $\Delta$ <i>prpTA/prpA</i> /mCherry | 39016 $\Delta$ <i>prpTA/prpA</i> with <i>att-ctx</i> insertion of <i>prpT/A</i> promoter fused to mCherry                                                                 | This study                                  |
| PA14                                      | Wild-type                                                                                                                                                                 | (2)                                         |
| PA14/ <i>prpA</i>                         | PA14 with pUCP18/ <i>prpA</i> plasmid, crb <sup>r</sup>                                                                                                                   | This study                                  |
| PA14/ VEC                                 | PA14 with pUCP18 plasmid, crb <sup>r</sup>                                                                                                                                | This study                                  |
| <i>E. coli</i> strains                    |                                                                                                                                                                           |                                             |
| DH5 $\alpha$                              | F <sup>-</sup> $\Phi$ 80lacZ $\Delta$ M15 $\Delta$ (lacZYA-argF) U169 recA1 endA1 hsdR17 (rK <sup>-</sup> , mK <sup>+</sup> ) phoA supE44 $\lambda$ - thi-1 gyrA96 relA1. | Bio-Lab                                     |
| S17                                       | <i>E. coli</i> S17 thi, pro, hsdR, recA::RP4 -2-Tc::Mu aphA::Tn7, $\lambda$ -pir, Smr, Tpr                                                                                | (3)                                         |
| BTH101                                    | F <sup>-</sup> , cya-99, araD139, galE15, galK16, rpsL1 (Str <sup>r</sup> ), hsdR2, mcrA1, mcrB1                                                                          | (4)                                         |
| BTH101 <i>prpA</i>                        | BTH101 with pUT18C/ <i>prpA</i> and an empty pKT25 plasmids, amp <sup>r</sup> , kan <sup>r</sup> , str <sup>r</sup>                                                       | This study                                  |

| BTH101 <i>prpT</i>      | BTH101 with pKT25/ <i>prpT</i> and an empty pUT18C plasmids, <i>amp<sup>r</sup></i> , <i>kan<sup>r</sup></i> , <i>str<sup>r</sup></i>                                        | This study |
|-------------------------|------------------------------------------------------------------------------------------------------------------------------------------------------------------------------|------------|
| BTH101 <i>prpA/prpT</i> | BTH101 with pKT25/ <i>prpT</i> and pUT18C/ <i>prpA</i> plasmids, <i>amp<sup>r</sup></i> , <i>kan<sup>r</sup></i> , <i>str<sup>r</sup></i>                                    | This study |
| BTH101 vec              | BTH101 with empty pUT18C and pKT25 plasmids, <i>amp<sup>r</sup></i> , <i>kan<sup>r</sup></i> , <i>str<sup>r</sup></i>                                                        | This study |
| Plasmids                |                                                                                                                                                                              |            |
| pUCP18-Ap               | <i>Crb<sup>r</sup></i> (for <i>P. aeruginosa</i> ), <i>Amp<sup>r</sup></i> (for <i>E. coli</i> ), overexpression plasmid, <i>lacZ</i> promoter                               | (5)        |
| pDONRPEX18Gm            | <i>Gm<sup>r</sup></i> and <i>Cm<sup>r</sup></i> , pEX18Gm containing a <i>HindIII</i> flanked, <i>attP</i> cloning site from pDONR201                                        | (6)        |
| mini-CTX-LacZ           | TetR, integration vector for single-copy, chromosomal <i>lacZ</i> fusions; $\Omega$ -FRT- <i>attP</i> -MCS, <i>ori</i> , <i>int</i> , and <i>oriT</i>                        | (7)        |
| pUCP18T-miniTn7T-Gm     | <i>Amp<sup>r</sup></i> and <i>Gm<sup>r</sup></i> ; <i>Gmr</i> on mini-Tn7T, mobilizable suicide plasmid                                                                      | (8)        |
| pJN105                  | Overexpression plasmid under <i>araC</i> promoter                                                                                                                            | (9)        |
| pKT25                   | <i>Kan<sup>r</sup></i> pSU40 derivative plasmid, encodes for T25 fragments under <i>lac</i> promoter. For expression of chimeric protein fused to the C-terminal end of T18. | (4)        |
| pUT18C                  | <i>Amp<sup>r</sup></i> pUC19 derivative plasmid, encodes for T18 fragments under <i>lac</i> promoter. For expression of chimeric protein fused to the C-terminal end of T18. | (4)        |

**Table S2**

| Primer                     | Sequence                                               |
|----------------------------|--------------------------------------------------------|
| M13_F                      | CCCAGTCACGACGTTGTAAAACG                                |
| M13_R                      | AGCGGATAACAATTCACACAGG                                 |
| AmpR_F                     | CGCGGAACCCCTATTGT                                      |
| AmpR_R                     | TTACCAATGCTTAATCAGTGAGG                                |
| <i>prpA</i> _ko_upF_GWB1   | GGGGACAAGTTTGTACAAAAAAGCAGGCTCAGGAATGAGGCTGCCTCGC      |
| <i>prpA</i> _ampR_ko_upR   | AACAAATAGGGTTCCGCGCATCAGTCCCTCCTCACG                   |
| <i>prpA</i> _ampR_ko_DownF | CCTCACTGATTAAGCATTGGTAAGGAAGCTCCGAACAAGTCAG            |
| <i>prpA</i> _ko_DownR_GWB2 | GGGGACCACTTTGTACAAGAAAGCTGGGTAGTCGGTGGGCGGACTCAA       |
| <i>prpT</i> _ko_upF        | ACATCAGAGATTTTGTAGACACGGGCCAGAGCGCAATGCAACCAGCATCC     |
| <i>prpT</i> _ampR_ko_upR   | TTAGAAAAATAACAAATAGGGTTCCGCGAAAATATAACCCCCAGGGAATATT   |
| <i>prpT</i> _ampR_ko_DownF | ATAGGTGCCTCACTGATTAAGCATTGGTAAATGGTAAAGAAATTCTCCGACCT  |
| <i>prpT</i> _ko_DownR      | GCAAGCTTGTTAACGCTAGCATGGATCTCGTGACCAAGAACACCGTGCAA     |
| <i>prpA</i> _F_pUCP18      | ATCCAGAGCTCTAAGGAGGAATAACATTCGATGGTTAAGAAATTCTCCGAC    |
| <i>prpA</i> _R_pUCP18      | ATCCAAAGCTTTTAGGCGCCCGCTCTTC                           |
| <i>prpA</i> _R_FLAG_pUCP18 | ATCCAAAGCTTTTACTTGTATCGTCATCCTTGTAGTCGGCGCTGCCTCTTCGAT |

|                             |                                                                |
|-----------------------------|----------------------------------------------------------------|
| <i>prT_F_pJN105</i>         | ATCCATCTAGACTTCTGAATAAGCTTCTGTGGCGTGGGATATCGAGT                |
| <i>prT_R_pJN105</i>         | ATCCAGAGCTCTTAACCATCGATCAGTCCCTC                               |
| <i>prT_R_HIS_pJN105</i>     | ATCCAGAGCTCTTAGTGATGATGATGATGATGACCATCGATCAGTCCCTCC            |
| <i>prA_F_miniTn7</i>        | ATCCATCTAGATAAGGAGGAATAACATTTCGATGGTTAAGAAATTCTCCGAC           |
| <i>prA_R_miniTn7</i>        | ATCCAGAGCTCTTAGGCGCCCGCTCTTC                                   |
| <i>araC_F</i>               | GGGCCCCCAATTATGACAACCTTGACGGC                                  |
| <i>prT/A_Prom_F_miniCtx</i> | TTACGCGAAATACGGGCAGACATGGCCTGCCCGTTATTAACCGATAACCGACGGAGGC     |
| <i>prT/A_Prom_R_mCherry</i> | TCCTCTCGCCCTTGCTCACAAAATATAACCCCCAGGGAATAT                     |
| <i>mCherry_F_prT/A_prom</i> | TTCCCTGGGGTTATATTTTGTGAGCAAGGGCGAGGA                           |
| <i>mCherry_R_miniCtx</i>    | TCATCCACCGGCGCGCTAATACGACTCACTATAGGGCGATACTGTACAGCTCGTCCATG    |
| <i>Prom_biot_F</i>          | 5'BIOT/GACTGGGGCTGGATCGGA                                      |
| <i>Prom_biot_R</i>          | 5'BIOT/AAAATATAACCCCCAGGGAATATT                                |
| <i>amrZ_F_qPCR</i>          | CAAATTCGTCGTTTCGTCTGC                                          |
| <i>amrZ_R_qPCR</i>          | CACCGAGATTGTCTTCGAGC                                           |
| <i>siaD_F_qPCR</i>          | AAGAAGTCCACGTCGAGCA                                            |
| <i>siaD_R_qPCR</i>          | TGAAGGAAGCCTCGATCCG                                            |
| <i>morA_F_qPCR</i>          | GATCAGCCTGTTTCCGAGC                                            |
| <i>morA_R_qPCR</i>          | GAACTGGAAGGTATTGCCGC                                           |
| <i>nbdA_F_qPCR</i>          | TGCTGAAGATCGTCTCCGAA                                           |
| <i>nbdA_R_qPCR</i>          | ATCTTCTGCATCAGGCGTTG                                           |
| <i>PA3540_F_qPCR</i>        | TGTCGCGCTACTACATGCGTC                                          |
| <i>PA3540_R_qPCR</i>        | GTGTCGTGGCTGGTGATGAGA                                          |
| <i>prA_F_pUT18C</i>         | CCGATTGCGGCGGCCGTCGCTGGGCGCAGTGGAACGCCAGTTAAGAAATTCTCCGACCTTCG |
| <i>prA_R_pUT18C</i>         | GAGCAGATTGTAAGTACTGAGAGTGCACCATATTACTTAGTTATGGCGCCCGCTCTTCGA   |
| <i>prT_F_pKT25</i>          | CCGATTACCTGGCGCGCACGCGCGGGCTGCAGGGTTCGACGCGTGGGATATCGAGTACAC   |
| <i>prT_R_pKT25</i>          | CACGACGTTGTAAAACGACGGCCGAATTCTTAGTTACTTAACCATCGATCAGTCCCTCCT   |

**Table S3**

| Genome                                           | <i>prA</i> loci | <i>prT</i> loci | <i>prA-prT</i> (bp) <sup>a</sup> |
|--------------------------------------------------|-----------------|-----------------|----------------------------------|
| <i>Pseudomonas_aeruginosa</i><br>_12-4-4_59_3618 | NA              | NA              | NA                               |

|                                              |                                            |                                            |    |
|----------------------------------------------|--------------------------------------------|--------------------------------------------|----|
| Pseudomonas_aeruginosa<br>_12939_6590        | NA                                         | NA                                         | NA |
| Pseudomonas_aeruginosa<br>_1334_14_10731     | NA                                         | NA                                         | NA |
| Pseudomonas_aeruginosa<br>_1811-13R031_12048 | NZ_CP046061.1:chromosome:5382108-5382431   | NZ_CP046061.1:chromosome:5382424-5382789   | 0  |
| Pseudomonas_aeruginosa<br>_1811-18R001_12049 | NZ_CP046060.1:chromosome:5382312-5382635   | NZ_CP046060.1:chromosome:5382628-5382993   | 0  |
| Pseudomonas_aeruginosa<br>_19BR_362          | NZ_AFXJ01000001.1:chromosome:901583-901906 | NZ_AFXJ01000001.1:chromosome:901225-901590 | 0  |
| Pseudomonas_aeruginosa<br>_213BR_361         | NZ_AFXK01000001.1:chromosome:901762-902085 | NZ_AFXK01000001.1:chromosome:901404-901769 | 0  |
| Pseudomonas_aeruginosa<br>_243931_11950      | NZ_CP041772.1:chromosome:677501-677824     | NZ_CP041772.1:chromosome:677817-678182     | 0  |
| Pseudomonas_aeruginosa<br>_24Pae112_9634     | NZ_CP029605.1:chromosome:5140503-5140826   | NZ_CP029605.1:chromosome:5140819-5141184   | 0  |
| Pseudomonas_aeruginosa<br>_268_9897          | NZ_CP032761.1:chromosome:5325042-5325365   | NZ_CP032761.1:chromosome:5325358-5325723   | 0  |
| Pseudomonas_aeruginosa<br>_519119_11949      | NZ_CP041773.1:chromosome:713919-714242     | NZ_CP041773.1:chromosome:714235-714600     | 0  |
| Pseudomonas_aeruginosa<br>_60503_11947       | NZ_CP041774.1:chromosome:4980008-4980331   | NZ_CP041774.1:chromosome:4980341-4980688   | 10 |
| Pseudomonas_aeruginosa<br>_8380_3922         | NZ_AP014839.1:chromosome:4843947-4844270   | NZ_AP014839.1:chromosome:4844263-4844628   | 0  |
| Pseudomonas_aeruginosa<br>_97_6674           | NA                                         | NA                                         | NA |
| Pseudomonas_aeruginosa<br>_97_9520           | NA                                         | NA                                         | NA |
| Pseudomonas_aeruginosa<br>_A681_11948        | NA                                         | NA                                         | NA |
| Pseudomonas_aeruginosa<br>_AES1M_10829       | NZ_CP037925.1:chromosome:1357130-1357453   | NZ_CP037925.1:chromosome:1356772-1357137   | 0  |
| Pseudomonas_aeruginosa<br>_AES1R_10830       | NZ_CP037926.1:chromosome:4720087-4720410   | NZ_CP037926.1:chromosome:4720403-4720768   | 0  |
| Pseudomonas_aeruginosa<br>_AG1_12046         | NZ_CP045739.1:chromosome:5298704-5299027   | NZ_CP045739.1:chromosome:5299020-5299367   | 0  |
| Pseudomonas_aeruginosa<br>_AR_0095_6299      | NZ_CP027538.1:chromosome:4732527-4732850   | NZ_CP027538.1:chromosome:4732169-4732534   | 0  |
| Pseudomonas_aeruginosa<br>_AR_0110_6371      | NA                                         | NA                                         | NA |
| Pseudomonas_aeruginosa<br>_AR_0111_9636      | NA                                         | NA                                         | NA |
| Pseudomonas_aeruginosa<br>_AR_0230_6281      | NA                                         | NA                                         | NA |

|                                             |                                          |                                          |    |
|---------------------------------------------|------------------------------------------|------------------------------------------|----|
| Pseudomonas_aeruginosa<br>_AR_0353_6205     | NZ_CP027172.1:chromosome:1917031-1917354 | NZ_CP027172.1:chromosome:1916673-1917038 | 0  |
| Pseudomonas_aeruginosa<br>_AR_0354_6975     | NZ_CP027171.1:chromosome:2827871-2828194 | NZ_CP027171.1:chromosome:2828187-2828552 | 0  |
| Pseudomonas_aeruginosa<br>_AR_0356_7083     | NA                                       | NA                                       | NA |
| Pseudomonas_aeruginosa<br>_AR_0357_7058     | NZ_CP027166.1:chromosome:3591865-3592188 | NZ_CP027166.1:chromosome:3591507-3591872 | 0  |
| Pseudomonas_aeruginosa<br>_AR_0360_6841     | NA                                       | NA                                       | NA |
| Pseudomonas_aeruginosa<br>_AR_0446_6897     | NA                                       | NA                                       | NA |
| Pseudomonas_aeruginosa<br>_AR439_6890       | NA                                       | NA                                       | NA |
| Pseudomonas_aeruginosa<br>_AR441_6528       | NA                                       | NA                                       | NA |
| Pseudomonas_aeruginosa<br>_AR442_6465       | NZ_CP029090.1:chromosome:4419525-4419848 | NZ_CP029090.1:chromosome:4419841-4420206 | 0  |
| Pseudomonas_aeruginosa<br>_AR444_6466       | NA                                       | NA                                       | NA |
| Pseudomonas_aeruginosa<br>_AR445_6560       | NZ_CP029088.1:chromosome:5234080-5234403 | NZ_CP029088.1:chromosome:5234396-5234743 | 0  |
| Pseudomonas_aeruginosa<br>_AR_455_7148      | NA                                       | NA                                       | NA |
| Pseudomonas_aeruginosa<br>_AR_458_7202      | NA                                       | NA                                       | NA |
| Pseudomonas_aeruginosa<br>_AR_460_7261      | NA                                       | NA                                       | NA |
| Pseudomonas_aeruginosa<br>_ATCC_15692_4007  | NA                                       | NA                                       | NA |
| Pseudomonas_aeruginosa<br>_ATCC_27853_3989  | NA                                       | NA                                       | NA |
| Pseudomonas_aeruginosa<br>_ATCC_27853_9518  | NA                                       | NA                                       | NA |
| Pseudomonas_aeruginosa<br>_AZPAE15042_11928 | NA                                       | NA                                       | NA |
| Pseudomonas_aeruginosa<br>_B136-33_191      | NC_020912.1:chromosome:4662648-4662971   | NC_020912.1:chromosome:4662964-4663329   | 0  |
| Pseudomonas_aeruginosa<br>_B14130_10394     | NA                                       | NA                                       | NA |
| Pseudomonas_aeruginosa<br>_B17932_10395     | NA                                       | NA                                       | NA |
| Pseudomonas_aeruginosa<br>_B41226_10391     | NA                                       | NA                                       | NA |
| Pseudomonas_aeruginosa<br>_BA15561_9944     | NA                                       | NA                                       | NA |
| Pseudomonas_aeruginosa<br>_BA7823_9659      | NA                                       | NA                                       | NA |
| Pseudomonas_aeruginosa<br>_BAMC_07-48_3994  | NZ_CP015377.1:chromosome:229714-230037   | NZ_CP015377.1:chromosome:230030-230395   | 0  |
| Pseudomonas_aeruginosa<br>_C79_11954        | NA                                       | NA                                       | NA |

|                                                            |                                          |                                          |    |
|------------------------------------------------------------|------------------------------------------|------------------------------------------|----|
| <i>Pseudomonas aeruginosa</i><br>_Carb01_63_2626           | NZ_CP011317.1:chromosome:5425890-5426213 | NZ_CP011317.1:chromosome:5426206-5426553 | 0  |
| <i>Pseudomonas aeruginosa</i><br>_CCUG_51971_11974         | NZ_CP043328.1:chromosome:5093302-5093625 | NZ_CP043328.1:chromosome:5093618-5093983 | 0  |
| <i>Pseudomonas aeruginosa</i><br>_CCUG_70744_6254          | NZ_CP023255.1:chromosome:3020126-3020449 | NZ_CP023255.1:chromosome:3020442-3020807 | 0  |
| <i>Pseudomonas aeruginosa</i><br>_CFSAN084950_12043        | NZ_CP045768.1:chromosome:3723230-3723553 | NZ_CP045768.1:chromosome:3723546-3723911 | 0  |
| <i>Pseudomonas aeruginosa</i><br>_CR1_6461                 | NA                                       | NA                                       | NA |
| <i>Pseudomonas aeruginosa</i><br>_CR1_7655                 | NA                                       | NA                                       | NA |
| <i>Pseudomonas aeruginosa</i><br>_DH01_3915                | NZ_CP013993.1:chromosome:5265765-5266088 | NZ_CP013993.1:chromosome:5266081-5266446 | 0  |
| <i>Pseudomonas aeruginosa</i><br>_DK1_substr_NH57388A_6643 | NA                                       | NA                                       | NA |
| <i>Pseudomonas aeruginosa</i><br>_DK2_174                  | NA                                       | NA                                       | NA |
| <i>Pseudomonas aeruginosa</i><br>_DN1_5583                 | NA                                       | NA                                       | NA |
| <i>Pseudomonas aeruginosa</i><br>_DN1_7646                 | NA                                       | NA                                       | NA |
| <i>Pseudomonas aeruginosa</i><br>_DSM_50071_2857           | NZ_CP012001.1:chromosome:4623083-4623406 | NZ_CP012001.1:chromosome:4623399-4623764 | 0  |
| <i>Pseudomonas aeruginosa</i><br>_E6130952_7221            | NZ_CP020603.1:chromosome:5201097-5201420 | NZ_CP020603.1:chromosome:5201413-5201778 | 0  |
| <i>Pseudomonas aeruginosa</i><br>_E80_10733                | NZ_CP031677.1:chromosome:5090735-5091058 | NZ_CP031677.1:chromosome:5091051-5091416 | 0  |
| <i>Pseudomonas aeruginosa</i><br>_E90_12001                | NZ_CP044006.1:chromosome:5078878-5079201 | NZ_CP044006.1:chromosome:5079194-5079559 | 0  |
| <i>Pseudomonas aeruginosa</i><br>_F22031_3096              | NA                                       | NA                                       | NA |
| <i>Pseudomonas aeruginosa</i><br>_F23197_6110              | NZ_CP008856.2:chromosome:4764867-4765190 | NZ_CP008856.2:chromosome:4765183-4765548 | 0  |
| <i>Pseudomonas aeruginosa</i><br>_F23197_7640              | NZ_CP008856.1:chromosome:4605794-4606117 | NZ_CP008856.1:chromosome:4605436-4605801 | 0  |
| <i>Pseudomonas aeruginosa</i><br>_F5677_6730               | NZ_CP026680.1:chromosome:4823788-4824111 | NZ_CP026680.1:chromosome:4824104-4824451 | 0  |
| <i>Pseudomonas aeruginosa</i><br>_F63912_7033              | NZ_CP008858.2:chromosome:4857393-4857716 | NZ_CP008858.2:chromosome:4857709-4858074 | 0  |
| <i>Pseudomonas aeruginosa</i><br>_F63912_7645              | NZ_CP008858.1:chromosome:471683-472006   | NZ_CP008858.1:chromosome:471325-471690   | 0  |
| <i>Pseudomonas aeruginosa</i><br>_F9676_2900               | NZ_CP012066.1:chromosome:1235086-1235409 | NZ_CP012066.1:chromosome:1234728-1235093 | 0  |

|                                                 |                                          |                                          |    |
|-------------------------------------------------|------------------------------------------|------------------------------------------|----|
| Pseudomonas_aeruginosa<br>_FA-HZ1_4011          | NZ_CP017353.1:chromosome:861431-861754   | NZ_CP017353.1:chromosome:861747-862112   | 0  |
| Pseudomonas_aeruginosa<br>_FDAARGOS_501_9954    | NZ_CP033843.1:chromosome:743127-743450   | NZ_CP033843.1:chromosome:743443-743808   | 0  |
| Pseudomonas_aeruginosa<br>_FDAARGOS_505_9955    | NA                                       | NA                                       | NA |
| Pseudomonas_aeruginosa<br>_FDAARGOS_532_9952    | NA                                       | NA                                       | NA |
| Pseudomonas_aeruginosa<br>_FDAARGOS_570_9956    | NZ_CP033835.1:chromosome:1982020-1982343 | NZ_CP033835.1:chromosome:1981662-1982027 | 0  |
| Pseudomonas_aeruginosa<br>_FDAARGOS_571_9953    | NZ_CP033833.1:chromosome:1390474-1390797 | NZ_CP033833.1:chromosome:1390790-1391155 | 0  |
| Pseudomonas_aeruginosa<br>_FDAARGOS_610_11151   | NZ_CP041013.1:chromosome:1832789-1833112 | NZ_CP041013.1:chromosome:1832431-1832796 | 0  |
| Pseudomonas_aeruginosa<br>_FDAARGOS_767_11150   | NA                                       | NA                                       | NA |
| Pseudomonas_aeruginosa<br>_FRD1_2621            | NZ_CP010555.1:chromosome:6028298-6028621 | NZ_CP010555.1:chromosome:6027958-6028305 | 0  |
| Pseudomonas_aeruginosa<br>_GIMC5015:PAKB6_10430 | NA                                       | NA                                       | NA |
| Pseudomonas_aeruginosa<br>_H25883_9950          | NA                                       | NA                                       | NA |
| Pseudomonas_aeruginosa<br>_H26023_9951          | NA                                       | NA                                       | NA |
| Pseudomonas_aeruginosa<br>_H26027_9949          | NA                                       | NA                                       | NA |
| Pseudomonas_aeruginosa<br>_H27930_5910          | NA                                       | NA                                       | NA |
| Pseudomonas_aeruginosa<br>_H27930_7642          | NA                                       | NA                                       | NA |
| Pseudomonas_aeruginosa<br>_H5708_6745           | NZ_CP008859.2:chromosome:4674110-4674433 | NZ_CP008859.2:chromosome:4674426-4674791 | 0  |
| Pseudomonas_aeruginosa<br>_H5708_7641           | NZ_CP008859.1:chromosome:2428869-2429192 | NZ_CP008859.1:chromosome:2428511-2428876 | 0  |
| Pseudomonas_aeruginosa<br>_HOU1_11979           | NZ_CP042269.1:chromosome:4486040-4486363 | NZ_CP042269.1:chromosome:4486356-4486721 | 0  |
| Pseudomonas_aeruginosa<br>_HS9_6770             | NZ_CP030861.1:chromosome:4373149-4373472 | NZ_CP030861.1:chromosome:4372791-4373156 | 0  |
| Pseudomonas_aeruginosa<br>_IMP-13_10390         | NA                                       | NA                                       | NA |
| Pseudomonas_aeruginosa<br>_IMP66_11969          | NZ_CP028959.1:chromosome:4684351-4684674 | NZ_CP028959.1:chromosome:4684667-4685032 | 0  |
| Pseudomonas_aeruginosa<br>_IMP67_11967          | NZ_CP028848.1:chromosome:4671378-4671701 | NZ_CP028848.1:chromosome:4671694-4672059 | 0  |
| Pseudomonas_aeruginosa<br>_IMP68_11968          | NZ_CP028849.1:chromosome:4669435-4669758 | NZ_CP028849.1:chromosome:4669751-4670116 | 0  |

|                                                                   |                                                  |                                                  |    |
|-------------------------------------------------------------------|--------------------------------------------------|--------------------------------------------------|----|
| Pseudomonas_aeruginosa<br>_INP-43_12123                           | NA                                               | NA                                               | NA |
| Pseudomonas_aeruginosa<br>_IOMTU_133_3923                         | NZ_AP017302.1:chromosome:5084451-5084774         | NZ_AP017302.1:chromosome:5084767-5085132         | 0  |
| Pseudomonas_aeruginosa<br>_isolate_1_11152                        | NZ_LS998783.1:gnlDSMZPA5486Chr:5268691-5269014   | NZ_LS998783.1:gnlDSMZPA5486Chr:5269007-5269354   | 0  |
| Pseudomonas_aeruginosa<br>_isolate_B10W_5627                      | NZ_CP017969.1:chromosome:4803304-4803627         | NZ_CP017969.1:chromosome:4803620-4803985         | 0  |
| Pseudomonas_aeruginosa<br>_isolate_early_isolate_NN2_clone_C_6774 | NA                                               | NA                                               | NA |
| Pseudomonas_aeruginosa<br>_isolate_F30658_3634                    | NZ_CP008857.1:chromosome:2598431-2598754         | NZ_CP008857.1:chromosome:2598747-2599094         | 0  |
| Pseudomonas_aeruginosa<br>_isolate_F9670_3848                     | NA                                               | NA                                               | NA |
| Pseudomonas_aeruginosa<br>_isolate_H47921_3637                    | NA                                               | NA                                               | NA |
| Pseudomonas_aeruginosa<br>_isolate_M37351_3639                    | NA                                               | NA                                               | NA |
| Pseudomonas_aeruginosa<br>_isolate_PA14Or_reads_4013              | NA                                               | NA                                               | NA |
| Pseudomonas_aeruginosa<br>_isolate_paerg000_11157                 | NZ_LR130528.1:paerg000-contig000:2179667-2179990 | NZ_LR130528.1:paerg000-contig000:2179309-2179674 | 0  |
| Pseudomonas_aeruginosa<br>_isolate_paerg002_11158                 | NZ_LR130527.1:paerg002-contig000:1276671-1276994 | NZ_LR130527.1:paerg002-contig000:1276987-1277352 | 0  |
| Pseudomonas_aeruginosa<br>_isolate_paerg003_11160                 | NZ_LR130530.1:paerg003-contig000:4595901-4596224 | NZ_LR130530.1:paerg003-contig000:4596217-4596582 | 0  |
| Pseudomonas_aeruginosa<br>_isolate_paerg004_11159                 | NZ_LR130531.1:paerg004-contig000:1913627-1913950 | NZ_LR130531.1:paerg004-contig000:1913943-1914308 | 0  |
| Pseudomonas_aeruginosa<br>_isolate_paerg005_11161                 | NA                                               | NA                                               | NA |
| Pseudomonas_aeruginosa<br>_isolate_paerg009_11162                 | NA                                               | NA                                               | NA |
| Pseudomonas_aeruginosa<br>_isolate_paerg010_11163                 | NZ_LR130536.1:paerg010-contig000:4595890-4596213 | NZ_LR130536.1:paerg010-contig000:4596206-4596571 | 0  |
| Pseudomonas_aeruginosa<br>_isolate_paerg011_11164                 | NZ_LR130535.1:paerg011-contig000:4596034-4596357 | NZ_LR130535.1:paerg011-contig000:4596350-4596715 | 0  |
| Pseudomonas_aeruginosa<br>_isolate_paerg012_11165                 | NZ_LR130537.1:paerg012-contig000:4595911-4596234 | NZ_LR130537.1:paerg012-contig000:4596227-4596592 | 0  |



|                                              |                                          |                                          |    |
|----------------------------------------------|------------------------------------------|------------------------------------------|----|
| Pseudomonas_aeruginosa_isolate_PcylI-10_5293 | NZ_LT673656.1:chromosome:4613920-4614243 | NZ_LT673656.1:chromosome:4614236-4614601 | 0  |
| Pseudomonas_aeruginosa_isolate_RW109_6944    | NZ_LT969520.1:chromosome:5105589-5105912 | NZ_LT969520.1:chromosome:5105905-5106252 | 0  |
| Pseudomonas_aeruginosa_isolate_T52373_3627   | NZ_CP008867.1:chromosome:826684-827007   | NZ_CP008867.1:chromosome:827000-827365   | 0  |
| Pseudomonas_aeruginosa_isolate_T63266_3628   | NZ_CP008868.1:chromosome:28734-29057     | NZ_CP008868.1:chromosome:29050-29415     | 0  |
| Pseudomonas_aeruginosa_JB2_7002              | NA                                       | NA                                       | NA |
| Pseudomonas_aeruginosa_K34-7_7082            | NA                                       | NA                                       | NA |
| Pseudomonas_aeruginosa_KRP1_12050            | NZ_CP046069.1:chromosome:4767417-4767740 | NZ_CP046069.1:chromosome:4767733-4768098 | 0  |
| Pseudomonas_aeruginosa_L10_6318              | NA                                       | NA                                       | NA |
| Pseudomonas_aeruginosa_LES431_489            | NC_023066.1:chromosome:4918112-4918435   | NC_023066.1:chromosome:4918428-4918793   | 0  |
| Pseudomonas_aeruginosa_LESB58_125            | NC_011770:chromosome:4970871-4971194     | NC_011770:chromosome:4971187-4971552     | 0  |
| Pseudomonas_aeruginosa_LW_10696              | NZ_CP022478.1:chromosome:3792962-3793285 | NZ_CP022478.1:chromosome:3793278-3793643 | 0  |
| Pseudomonas_aeruginosa_M1608_7239            | NA                                       | NA                                       | NA |
| Pseudomonas_aeruginosa_M1608_7643            | NA                                       | NA                                       | NA |
| Pseudomonas_aeruginosa_M18_172               | NC_017548.1:chromosome:4658643-4658966   | NC_017548.1:chromosome:4658959-4659324   | 0  |
| Pseudomonas_aeruginosa_MRSN12280_6456        | NZ_CP028162.1:chromosome:5195357-5195680 | NZ_CP028162.1:chromosome:5195673-5196038 | 0  |
| Pseudomonas_aeruginosa_MTB-1_210             | NC_023019.1:chromosome:4727093-4727416   | NC_023019.1:chromosome:4727426-4727773   | 10 |
| Pseudomonas_aeruginosa_N15-01092_9635        | NZ_CP012901.1:chromosome:1762355-1762678 | NZ_CP012901.1:chromosome:1762015-1762362 | 0  |
| Pseudomonas_aeruginosa_N17-1_3988            | NZ_CP014948.1:chromosome:4732454-4732777 | NZ_CP014948.1:chromosome:4732770-4733135 | 0  |
| Pseudomonas_aeruginosa_NCGM1900_2620         | NZ_AP014622.1:chromosome:2005967-2006290 | NZ_AP014622.1:chromosome:2006283-2006648 | 0  |
| Pseudomonas_aeruginosa_NCGM1984_2619         | NZ_AP014646.1:chromosome:5023534-5023857 | NZ_AP014646.1:chromosome:5023850-5024215 | 0  |
| Pseudomonas_aeruginosa_NCGM257_3921          | NA                                       | NA                                       | NA |
| Pseudomonas_aeruginosa_NCGM2S1_173           | NC_017549.1:chromosome:1696665-1696988   | NC_017549.1:chromosome:1696307-1696672   | 0  |

|                                            |                                                                |                                                                |    |
|--------------------------------------------|----------------------------------------------------------------|----------------------------------------------------------------|----|
| Pseudomonas_aeruginosa<br>_NCTC10728_11169 | NZ_LR134342.1:ERS11789<br>33SCcontig000001:1320368<br>-1320691 | NZ_LR134342.1:ERS1<br>178933SCcontig00000<br>1:1320684-1321049 | 0  |
| Pseudomonas_aeruginosa<br>_NCTC11445_11166 | NZ_LR134308.1:ERS10438<br>09SCcontig000001:503114-<br>503437   | NZ_LR134308.1:ERS1<br>043809SCcontig00000<br>1:502756-503121   | 0  |
| Pseudomonas_aeruginosa<br>_NCTC12903_11167 | NA                                                             | NA                                                             | NA |
| Pseudomonas_aeruginosa<br>_NCTC13359_11326 | NZ_LR590473.1:ERS66635<br>1SCcontig000001:5395570-<br>5395893  | NZ_LR590473.1:ERS6<br>66351SCcontig000001<br>:5395886-5396251  | 0  |
| Pseudomonas_aeruginosa<br>_NCTC13618_11327 | NZ_LR590474.1:ERS66635<br>3SCcontig000001:4951694-<br>4952017  | NZ_LR590474.1:ERS6<br>66353SCcontig000001<br>:4952010-4952375  | 0  |
| Pseudomonas_aeruginosa<br>_NCTC13620_12150 | NA                                                             | NA                                                             | NA |
| Pseudomonas_aeruginosa<br>_NCTC13715_11168 | NZ_LR134330.1:ERS11107<br>14SCcontig000001:47137-<br>47460     | NZ_LR134330.1:ERS1<br>110714SCcontig00000<br>1:47470-47817     | 10 |
| Pseudomonas_aeruginosa<br>_NHmuc_5737      | NA                                                             | NA                                                             | NA |
| Pseudomonas_aeruginosa<br>_Ocean-1155_5897 | NA                                                             | NA                                                             | NA |
| Pseudomonas_aeruginosa<br>_Ocean-1175_6075 | NA                                                             | NA                                                             | NA |
| Pseudomonas_aeruginosa<br>_PA1088_5724     | NZ_CP015001.1:chromoso<br>me:4914519-4914842                   | NZ_CP015001.1:chro<br>mosome:4914835-<br>4915200               | 0  |
| Pseudomonas_aeruginosa<br>_PA11803_5097    | NZ_CP015003.1:chromoso<br>me:5211016-5211339                   | NZ_CP015003.1:chro<br>mosome:5211332-<br>5211697               | 0  |
| Pseudomonas_aeruginosa<br>_Pa1207_5865     | NA                                                             | NA                                                             | NA |
| Pseudomonas_aeruginosa<br>_PA121617_3995   | NA                                                             | NA                                                             | NA |
| Pseudomonas_aeruginosa<br>_Pa1242_6732     | NZ_CP022002.1:chromoso<br>me:2318071-2318394                   | NZ_CP022002.1:chro<br>mosome:2317713-<br>2318078               | 0  |
| Pseudomonas_aeruginosa<br>_Pa124_6251      | NA                                                             | NA                                                             | NA |
| Pseudomonas_aeruginosa<br>_Pa127_6938      | NA                                                             | NA                                                             | NA |
| Pseudomonas_aeruginosa<br>_PA1_497         | NC_022808.2:chromosome:<br>4842694-4843017                     | NC_022808.2:chromo<br>some:4843010-<br>4843375                 | 0  |
| Pseudomonas_aeruginosa<br>_PA_150577_6347  | NZ_CP017306.1:chromoso<br>me:4666303-4666626                   | NZ_CP017306.1:chro<br>mosome:4666619-<br>4666984               | 0  |
| Pseudomonas_aeruginosa<br>_PA_154197_5532  | NA                                                             | NA                                                             | NA |
| Pseudomonas_aeruginosa<br>_PA1_7599        | NC_022808.1:chromosome:<br>4799984-4800307                     | NC_022808.1:chromo<br>some:4799626-<br>4799991                 | 0  |
| Pseudomonas_aeruginosa<br>_PA1R_496        | NC_022806.1:chromosome:<br>4799984-4800307                     | NC_022806.1:chromo<br>some:4799626-<br>4799991                 | 0  |
| Pseudomonas_aeruginosa<br>_PA1RG_3201      | NZ_CP012679.1:chromoso<br>me:4842695-4843018                   | NZ_CP012679.1:chro<br>mosome:4843011-<br>4843376               | 0  |

|                                       |                                          |                                          |    |
|---------------------------------------|------------------------------------------|------------------------------------------|----|
| Pseudomonas_aeruginosa_PA298_11122    | NZ_CP040127.1:chromosome:4782878-4783201 | NZ_CP040127.1:chromosome:4783194-4783559 | 0  |
| Pseudomonas_aeruginosa_PA34_9522      | NA                                       | NA                                       | NA |
| Pseudomonas_aeruginosa_Pa58_6334      | NZ_CP021775.1:chromosome:5432926-5433249 | NZ_CP021775.1:chromosome:5433242-5433607 | 0  |
| Pseudomonas_aeruginosa_PA59_12042     | NZ_CP024630.1:chromosome:4974533-4974856 | NZ_CP024630.1:chromosome:4974849-4975214 | 0  |
| Pseudomonas_aeruginosa_PA7_119        | NA                                       | NA                                       | NA |
| Pseudomonas_aeruginosa_PA7790_5368    | NZ_CP014999.1:strain:5034891-5035214     | NZ_CP014999.1:strain:5035207-5035572     | 0  |
| Pseudomonas_aeruginosa_PA8281_5357    | NZ_CP015002.1:chromosome:5012556-5012879 | NZ_CP015002.1:chromosome:5012872-5013237 | 0  |
| Pseudomonas_aeruginosa_PA83_6078      | NA                                       | NA                                       | NA |
| Pseudomonas_aeruginosa_Pa84_6035      | NZ_CP021999.1:chromosome:4826774-4827097 | NZ_CP021999.1:chromosome:4827090-4827455 | 0  |
| Pseudomonas_aeruginosa_PABL012_9632   | NZ_CP031659.1:chromosome:4804875-4805198 | NZ_CP031659.1:chromosome:4805191-4805556 | 0  |
| Pseudomonas_aeruginosa_PABL017_9633   | NZ_CP031660.1:chromosome:4769939-4770262 | NZ_CP031660.1:chromosome:4770255-4770620 | 0  |
| Pseudomonas_aeruginosa_PABL048_9601   | NA                                       | NA                                       | NA |
| Pseudomonas_aeruginosa_PACS2_84       | NA                                       | NA                                       | NA |
| Pseudomonas_aeruginosa_PA_D1_3998     | NZ_CP012585.1:chromosome:4923959-4924282 | NZ_CP012585.1:chromosome:4924275-4924640 | 0  |
| Pseudomonas_aeruginosa_PA_D16_4001    | NZ_CP012581.1:chromosome:4962111-4962434 | NZ_CP012581.1:chromosome:4962427-4962792 | 0  |
| Pseudomonas_aeruginosa_PA_D21_4006    | NZ_CP012582.1:chromosome:4919245-4919568 | NZ_CP012582.1:chromosome:4919561-4919926 | 0  |
| Pseudomonas_aeruginosa_PA_D22_4002    | NZ_CP012583.1:chromosome:4962117-4962440 | NZ_CP012583.1:chromosome:4962433-4962798 | 0  |
| Pseudomonas_aeruginosa_PA_D2_3999     | NZ_CP012578.1:chromosome:4923132-4923455 | NZ_CP012578.1:chromosome:4923448-4923813 | 0  |
| Pseudomonas_aeruginosa_PA_D25_4003    | NZ_CP012584.1:chromosome:4963342-4963665 | NZ_CP012584.1:chromosome:4963658-4964023 | 0  |
| Pseudomonas_aeruginosa_PA_D5_4005     | NZ_CP012579.1:chromosome:4962128-4962451 | NZ_CP012579.1:chromosome:4962444-4962809 | 0  |
| Pseudomonas_aeruginosa_PA_D9_4000     | NZ_CP012580.1:chromosome:4925613-4925936 | NZ_CP012580.1:chromosome:4925929-4926294 | 0  |
| Pseudomonas_aeruginosa_PAER4_119_5012 | NZ_CP013113.1:chromosome:4820370-4820693 | NZ_CP013113.1:chromosome:4820686-4821051 | 0  |

|                                          |                                          |                                          |    |
|------------------------------------------|------------------------------------------|------------------------------------------|----|
| Pseudomonas_aeruginosa_PAK_12154         | NA                                       | NA                                       | NA |
| Pseudomonas_aeruginosa_PAK_6441          | NA                                       | NA                                       | NA |
| Pseudomonas_aeruginosa_PAO1_107          | NA                                       | NA                                       | NA |
| Pseudomonas_aeruginosa_PAO1161_10710     | NA                                       | NA                                       | NA |
| Pseudomonas_aeruginosa_PAO1_Orsay_5354   | NA                                       | NA                                       | NA |
| Pseudomonas_aeruginosa_PASGNDM345_6255   | NZ_CP020703.1:chromosome:5178938-5179261 | NZ_CP020703.1:chromosome:5179254-5179619 | 0  |
| Pseudomonas_aeruginosa_PASGNDM699_7104   | NZ_CP020704.1:chromosome:5270875-5271198 | NZ_CP020704.1:chromosome:5271191-5271556 | 0  |
| Pseudomonas_aeruginosa_PB350_6610        | NZ_CP025055.1:chromosome:5004750-5005073 | NZ_CP025055.1:chromosome:5005066-5005431 | 0  |
| Pseudomonas_aeruginosa_PB353_6129        | NA                                       | NA                                       | NA |
| Pseudomonas_aeruginosa_PB354_7065        | NA                                       | NA                                       | NA |
| Pseudomonas_aeruginosa_PB367_7067        | NZ_CP025056.1:chromosome:5004786-5005109 | NZ_CP025056.1:chromosome:5005102-5005467 | 0  |
| Pseudomonas_aeruginosa_PB368_7201        | NZ_CP025050.1:chromosome:4271095-4271418 | NZ_CP025050.1:chromosome:4271411-4271776 | 0  |
| Pseudomonas_aeruginosa_PB369_7191        | NZ_CP025049.1:chromosome:4238367-4238690 | NZ_CP025049.1:chromosome:4238683-4239048 | 0  |
| Pseudomonas_aeruginosa_PPF-1_6589        | NA                                       | NA                                       | NA |
| Pseudomonas_aeruginosa_RD1-3_12124       | NZ_CP047697.1:chromosome:2150573-2150896 | NZ_CP047697.1:chromosome:2150215-2150580 | 0  |
| Pseudomonas_aeruginosa_RIVM-EMC2982_6088 | NZ_CP016955.1:chromosome:1999795-2000118 | NZ_CP016955.1:chromosome:2000111-2000458 | 0  |
| Pseudomonas_aeruginosa_RP73_192          | NC_021577.1:chromosome:862284-862607     | NC_021577.1:chromosome:861926-862291     | 0  |
| Pseudomonas_aeruginosa_S86968_6031       | NA                                       | NA                                       | NA |
| Pseudomonas_aeruginosa_S86968_7634       | NA                                       | NA                                       | NA |
| Pseudomonas_aeruginosa_SCV20265_215      | NA                                       | NA                                       | NA |
| Pseudomonas_aeruginosa_SCVFeb_5350       | NA                                       | NA                                       | NA |
| Pseudomonas_aeruginosa_SCVJan_5538       | NA                                       | NA                                       | NA |
| Pseudomonas_aeruginosa_SP2230_10393      | NA                                       | NA                                       | NA |
| Pseudomonas_aeruginosa_SP4371_10392      | NA                                       | NA                                       | NA |
| Pseudomonas_aeruginosa_SP4527_10694      | NA                                       | NA                                       | NA |
| Pseudomonas_aeruginosa_SP4528_9945       | NA                                       | NA                                       | NA |

|                                                       |                                          |                                          |    |
|-------------------------------------------------------|------------------------------------------|------------------------------------------|----|
| Pseudomonas_aeruginosa<br>_ST773_12047                | NZ_CP041945.1:chromosome:4992489-4992812 | NZ_CP041945.1:chromosome:4992822-4993169 | 10 |
| Pseudomonas_aeruginosa<br>_T2101_12052                | NZ_CP039990.1:chromosome:4784570-4784893 | NZ_CP039990.1:chromosome:4784886-4785251 | 0  |
| Pseudomonas_aeruginosa<br>_T2436_12051                | NA                                       | NA                                       | NA |
| Pseudomonas_aeruginosa<br>_T38079_5952                | NA                                       | NA                                       | NA |
| Pseudomonas_aeruginosa<br>_T38079_7635                | NA                                       | NA                                       | NA |
| Pseudomonas_aeruginosa<br>_UCBPP-PA14_109             | NA                                       | NA                                       | NA |
| Pseudomonas_aeruginosa<br>_USDA-ARS-USMARC-41639_3640 | NZ_CP013989.1:chromosome:4729169-4729492 | NZ_CP013989.1:chromosome:4729485-4729850 | 0  |
| Pseudomonas_aeruginosa<br>_VA-134_3846                | NA                                       | NA                                       | NA |
| Pseudomonas_aeruginosa<br>_VRFPA04_230                | NZ_CP008739.1:chromosome:1886188-1886511 | NZ_CP008739.1:chromosome:1885830-1886195 | 0  |
| Pseudomonas_aeruginosa<br>_W16407_6873                | NZ_CP008869.2:chromosome:4984581-4984904 | NZ_CP008869.2:chromosome:4984897-4985262 | 0  |
| Pseudomonas_aeruginosa<br>_W16407_7636                | NZ_CP008869.1:chromosome:1117295-1117618 | NZ_CP008869.1:chromosome:1116937-1117302 | 0  |
| Pseudomonas_aeruginosa<br>_W36662_7266                | NA                                       | NA                                       | NA |
| Pseudomonas_aeruginosa<br>_W36662_7637                | NA                                       | NA                                       | NA |
| Pseudomonas_aeruginosa<br>_W45909_5913                | NZ_CP008871.2:chromosome:4954531-4954854 | NZ_CP008871.2:chromosome:4954847-4955212 | 0  |
| Pseudomonas_aeruginosa<br>_W45909_7638                | NZ_CP008871.1:chromosome:1000388-1000711 | NZ_CP008871.1:chromosome:1000030-1000395 | 0  |
| Pseudomonas_aeruginosa<br>_W60856_6659                | NZ_CP008864.2:chromosome:1764382-1764705 | NZ_CP008864.2:chromosome:1764024-1764389 | 0  |
| Pseudomonas_aeruginosa<br>_W60856_7639                | NZ_CP008864.1:chromosome:416026-416349   | NZ_CP008864.1:chromosome:415668-416033   | 0  |
| Pseudomonas_aeruginosa<br>_WCHPA075019_6412           | NZ_CP028584.1:chromosome:5098897-5099220 | NZ_CP028584.1:chromosome:5099213-5099578 | 0  |
| Pseudomonas_aeruginosa<br>_WCHPA075019_9521           | NZ_CP028584.2:chromosome:5098897-5099220 | NZ_CP028584.2:chromosome:5099213-5099578 | 0  |
| Pseudomonas_aeruginosa<br>_X78812_6522                | NA                                       | NA                                       | NA |
| Pseudomonas_aeruginosa<br>_X78812_7644                | NA                                       | NA                                       | NA |
| Pseudomonas_aeruginosa<br>_Y31_6550                   | NA                                       | NA                                       | NA |
| Pseudomonas_aeruginosa<br>_Y71_9532                   | NZ_CP030911.1:chromosome:4990210-4990533 | NZ_CP030911.1:chromosome:4990526-4990891 | 0  |

|                                   |                                          |                                          |   |
|-----------------------------------|------------------------------------------|------------------------------------------|---|
| Pseudomonas_aeruginosa_Y82_7124   | NZ_CP030912.1:chromosome:5889781-5890104 | NZ_CP030912.1:chromosome:5890097-5890444 | 0 |
| Pseudomonas_aeruginosa_Y89_7172   | NZ_CP030913.1:chromosome:4927126-4927449 | NZ_CP030913.1:chromosome:4927442-4927807 | 0 |
| Pseudomonas_aeruginosa_YB01_12114 | NZ_CP028132.1:chromosome:4598419-4598742 | NZ_CP028132.1:chromosome:4598735-4599100 | 0 |
| Pseudomonas_aeruginosa_YL84_2501  | NZ_CP007147.1:chromosome:2522961-2523284 | NZ_CP007147.1:chromosome:2522603-2522968 | 0 |

<sup>a</sup>The genomic distance between the *prfT-prrA* homologs, the 0 value indicates gene overlap

**A**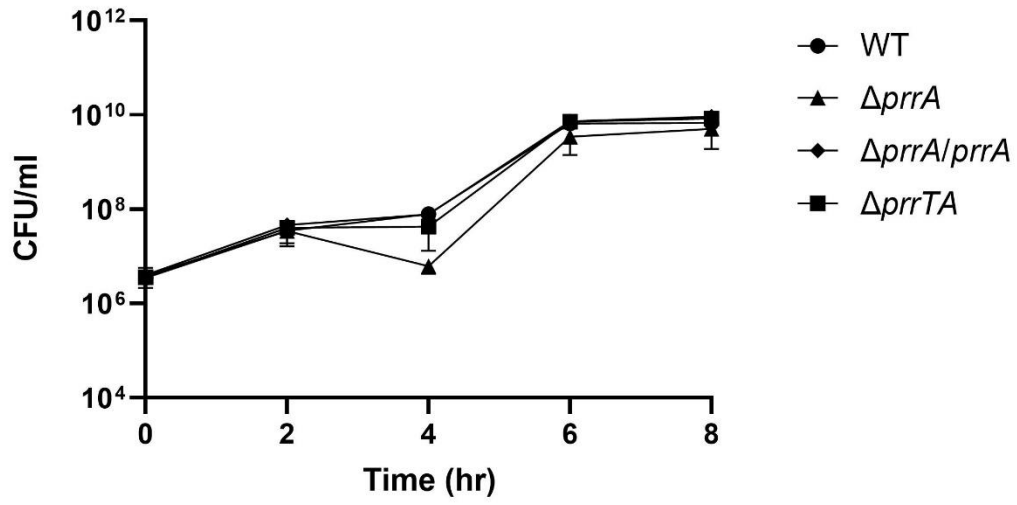**B**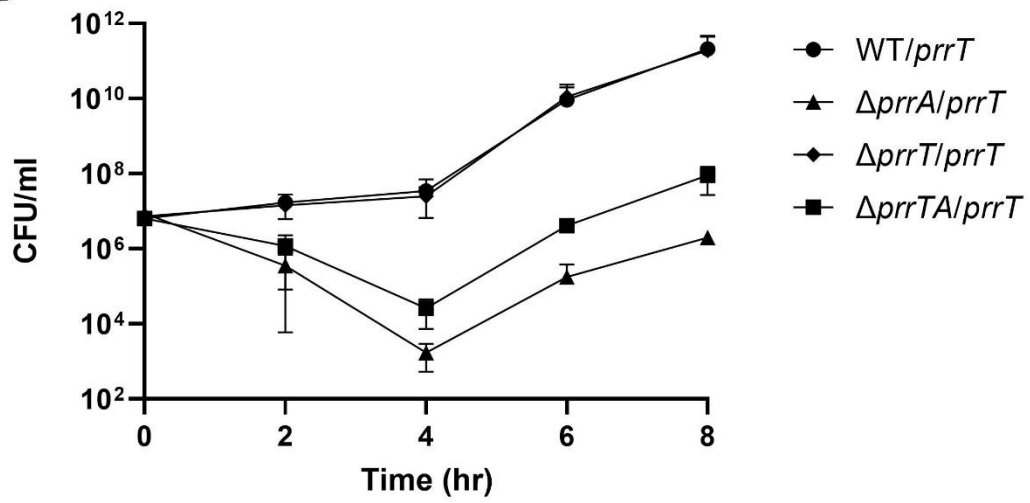

Figure S1

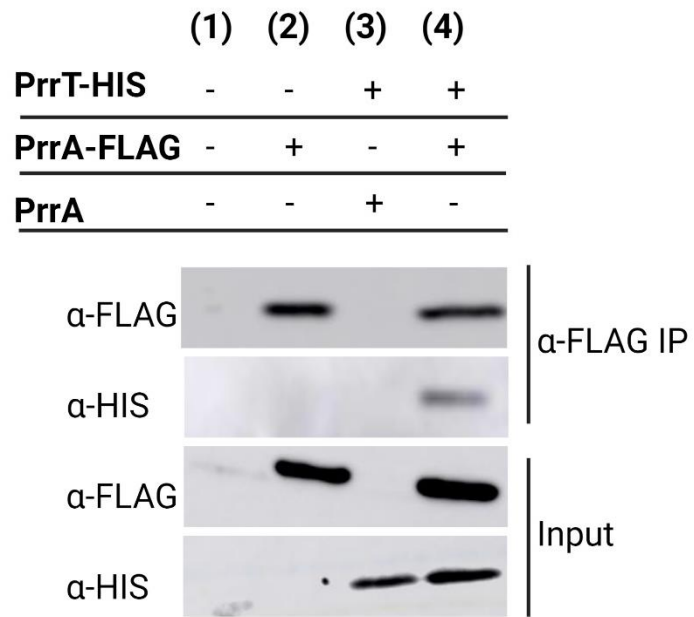

Figure S2

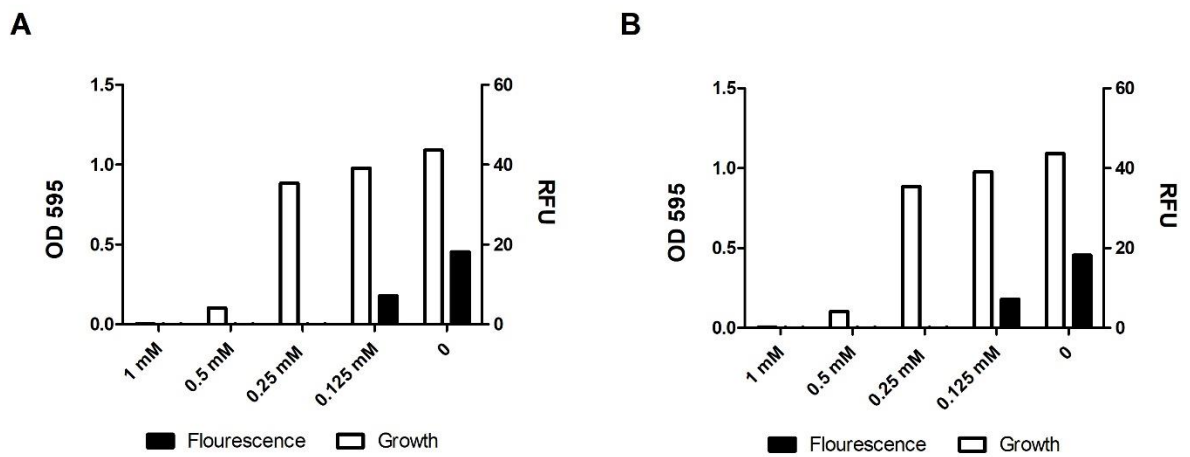

Figure S3



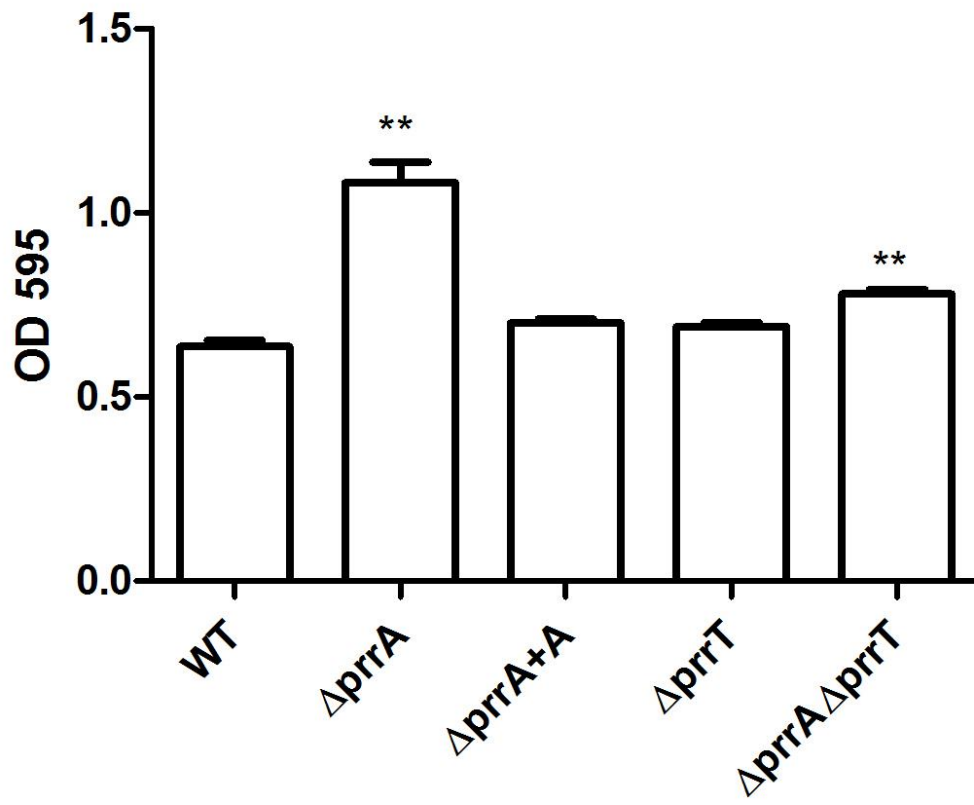

Figure S4

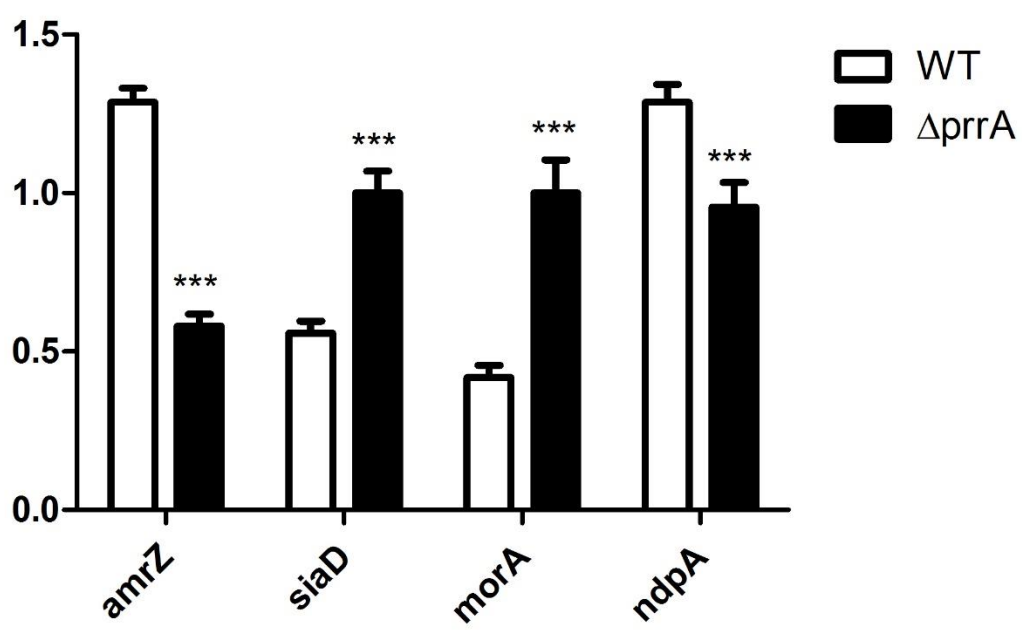

Figure S5

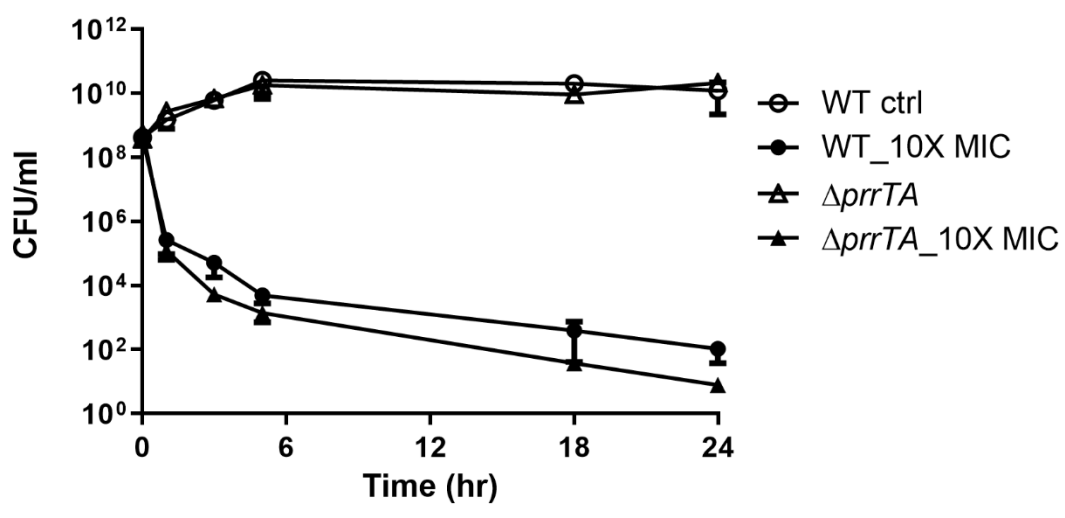

Figure S6

## Supplementary references

1. Wozniak DJ, Ohman DE. 1991. *Pseudomonas aeruginosa* AlgB, a two-component response regulator of the NtrC family, is required for algD transcription. *J Bacteriol* 173: 1406–1413.
2. He J, Baldini RL, Déziel E, Saucier M, Zhang Q, Liberati NT, Lee D, Urbach J, Goodman HM, Rahme LG. 2004. The broad host range pathogen *Pseudomonas aeruginosa* strain PA14 carries two pathogenicity islands harboring plant and animal virulence genes. *Proc Natl Acad Sci U S A* 101: 2530–2535..
3. Simon R, Priefer U, Puhler A. 1983. A broad host range mobilization system for in vivo genetic engineering: transposon mutagenesis in gram negative bacteria. *Nat Biotechnol* 784–791.
4. Karimova G, Pidoux J, Ullmann A, Ladant D. 1998. A bacterial two-hybrid system based on a reconstituted signal transduction pathway. *Proc Natl Acad Sci U S A* 95:5752-5756.
5. Schweizer HP. 1991. *Escherichia-Pseudomonas* shuttle vectors derived from pUC18/19. *Gene* 97:109–112.
6. Laura R. Hmelo BR et al K. 2016. Precision-engineering the *Pseudomonas aeruginosa* genome with two-step allelic exchange. *Nat Rev Drug Discov* 5:1–8.
7. Becher A, Schweizer HP. 2000. Integration-proficient *Pseudomonas aeruginosa* vectors for isolation of single-copy chromosomal *lacZ* and *lux* gene fusions. *Biotechniques* 29:948-50.
8. Choi KH, Schweizer HP. 2006. mini-Tn7 insertion in bacteria with single *attTn7* sites: Example *Pseudomonas aeruginosa*. *Nat Protoc* 1:153–161.
9. Newman JR, Fuqua C. 1999. Broad-host-range expression vectors that carry the L-arabinose-inducible *Escherichia coli* araBAD promoter and the araC regulator. *Gene* 227:197–203.
